# Supplementary material for: Administration of Tramadol or Buprenorphine via the drinking water for post-operative analgesia in a mouse-osteotomy model
Source: PubMed Central journal article supplement (PMC6656891; doi:10.1038/s41598-019-47186-5), 2019-07-24
Supplement: 41598_2019_47186_MOESM1_ESM.pdf [file 41598_2019_47186_MOESM1_ESM.pdf]

## Supplemental Information

### Administration of Tramadol or Buprenorphine via the drinking water for post-operatively analgesia in a mouse-osteotomy model

Paulin Jirkof<sup>1#</sup>, Mattea Durst<sup>1,2#</sup>, Robert Klopffleisch<sup>3</sup>, Rupert Palme<sup>4</sup>, Christa Thöne-Reineke<sup>5</sup>, Frank Buttgereit<sup>2,6</sup>, Katharina Schmidt-Bleek<sup>7,8</sup>, Annemarie Lang<sup>2,6,8\*</sup>

<sup>1</sup> Division of Surgical Research, University Hospital Zurich, University of Zurich, Zurich, Switzerland

<sup>2</sup> Charité – Universitätsmedizin Berlin, corporate member of Freie Universität Berlin, Humboldt-Universität zu Berlin, and Berlin Institute of Health, Department of Rheumatology and Clinical Immunology, Berlin, Germany

<sup>3</sup> Institute of Veterinary Pathology, Freie Universität Berlin, Germany

<sup>4</sup> Unit of Physiology, Pathophysiology and Experimental Endocrinology, Department of Biomedical Sciences, University of Veterinary Medicine, Vienna, Austria

<sup>5</sup> Institute of Animal Welfare, Animal Behavior and Laboratory Animal Science, Department of Veterinary Medicine, Freie Universität Berlin, Berlin, Germany

<sup>6</sup> German Rheumatism Research Centre (DRFZ) Berlin, a Leibniz Institute, Berlin, Germany

<sup>7</sup> Charité – Universitätsmedizin Berlin, corporate member of Freie Universität Berlin, Humboldt-Universität zu Berlin, and Berlin Institute of Health, Julius Wolff Institute and Center for Musculoskeletal Surgery, Berlin, Germany

<sup>8</sup> Charité – Universitätsmedizin Berlin, corporate member of Freie Universität Berlin, Humboldt-Universität zu Berlin, and Berlin Institute of Health Berlin Brandenburg Center for Regenerative Therapies, Berlin, Germany

# These authors contributed equally.

\*Corresponding author: Annemarie Lang, Address: Charitéplatz 1, 10117 Berlin, Germany. Tel: (+49) 30 450 513450. Email: annemarie.lang@charite.de

**Table S1: Food and water intake of the control groups (AN, DW)**

| Groups                     | Food intake (g)<br>Median (Min – Max) |                       |                      |                       |                        | Water intake (ml)<br>Median (Min – Max) |                       |                      |                        |                        |
|----------------------------|---------------------------------------|-----------------------|----------------------|-----------------------|------------------------|-----------------------------------------|-----------------------|----------------------|------------------------|------------------------|
|                            | 0 h                                   | 24 h                  | 48 h                 | 72 h                  | 96 h                   | 0 h                                     | 24 h                  | 48 h                 | 72 h                   | 96 h                   |
| <b>T<sub>low</sub> AN</b>  | 8.28<br>(7.63 – 8.93)                 | 8.25<br>(2.4 – 14.1)  | 4.44<br>(3.9 – 5.0)  | 10.07<br>(5.4 – 14.7) | 8.94<br>(4.5 – 13.4)   | 8.32<br>(8.1 – 8.6)                     | 4.96<br>(1.3 – 8.6)   | 8.52<br>(7.1 – 10.0) | 12.79<br>(11.3 – 14.3) | 9.62<br>(9.6 – 9.6)    |
| <b>T<sub>high</sub> AN</b> | 9.23<br>(8.7 – 9.8)                   | 5.56<br>(5.0 – 6.0)   | 2.93<br>(0.3 – 5.5)  | 8.50<br>(7.2 – 9.8)   | 10.61<br>(10.3 – 10.9) | 9.18<br>(8.3 – 10.1)                    | 8.65<br>(6.0 – 11.3)  | 1.63<br>(0.9 – 2.4)  | 10.13<br>(9.4 – 10.8)  | 10.52<br>(9.9 – 11.2)  |
| <b>Bup AN</b>              | 8.21<br>(7.3 – 9.1)                   | 7.30<br>(7.0 – 7.6)   | 4.39<br>(2.4 – 6.4)  | 7.47<br>(6.4 – 8.5)   | 8.94<br>(7.3 – 10.6)   | 8.54<br>(8.2 – 8.9)                     | 7.47<br>(6.4 – 8.6)   | 6.41<br>(6.0 – 6.8)  | 9.68<br>(9.5 – 9.8)    | 8.09<br>(8.1 – 8.1)    |
| <b>T<sub>low</sub> DW</b>  | 8.19<br>(8.0 – 8.4)                   | 10.78<br>(8.6 – 13.0) | 8.36<br>(7.8 – 8.9)  | 6.96<br>(6.5 – 7.4)   | 8.06<br>(5.2 – 10.9)   | 8.76<br>(8.3 – 9.2)                     | 10.44<br>(8.4 – 12.5) | 9.08<br>(5.8 – 12.4) | 8.86<br>(8.8 – 8.9)    | 7.81<br>(7.8 – 7.8)    |
| <b>T<sub>high</sub> DW</b> | 8.53<br>(8.2 – 8.9)                   | 8.01<br>(7.6 – 8.4)   | 8.40<br>(6.5 – 10.4) | 6.27<br>(2.7 – 9.8)   | 10.28<br>(7.2 – 13.3)  | 9.27<br>(8.2 – 10.3)                    | 9.86<br>(4.7 – 15.1)  | 6.89<br>(5.3 – 8.5)  | 7.38<br>(6.9 – 7.8)    | 10.52<br>(10.8 – 10.3) |
| <b>Bup DW</b>              | 8.60<br>(7.3 – 9.9)                   | 10.32<br>(9.9 – 10.7) | 6.50<br>(6.3 – 6.7)  | 7.65<br>(7.6 – 7.8)   | 8.03<br>(7.2 – 8.8)    | 8.65<br>(8.3 – 9.0)                     | 4.62<br>(2.3 – 7.0)   | 6.37<br>(4.5 – 8.3)  | 8.55<br>(7.3 – 9.8)    | 6.40<br>(6.1 – 6.7)    |

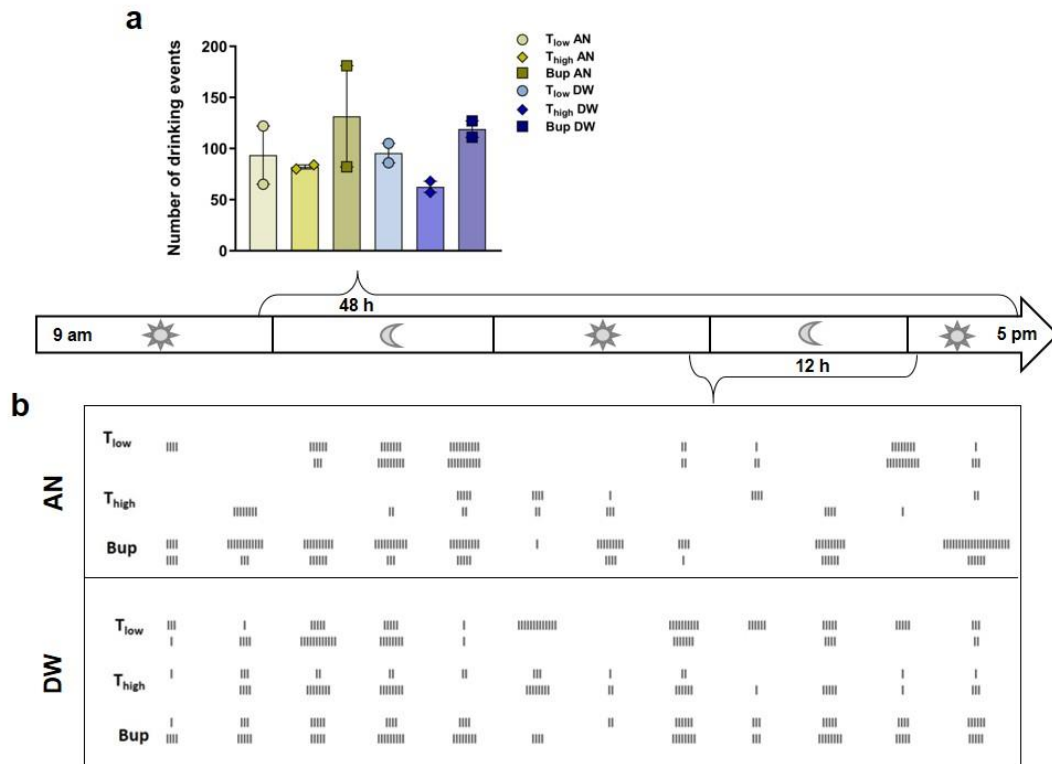

**Figure S1: Drinking frequency of control (AN, DW) groups.** (a) Total number of drinking events for 48 h was assessed via video recording. Data are shown for AN and DW groups as scatter dot plot and bar with median  $\pm$  interquartile ranges ( $n = 2$ ). (b) Depiction of the drinking events over 12 h between 36 h and 48 h post-osteotomy. Each line indicates one drinking event ( $n = 2$ ).

**Table S2: Exact  $p$ -values** for differences between measured and initial body weight (one sample t test; hypothetical mean = 100)

| Groups     | OT      |         |         |         |       | AN    |       |         |       |       | DW      |       |       |       |       |
|------------|---------|---------|---------|---------|-------|-------|-------|---------|-------|-------|---------|-------|-------|-------|-------|
|            | 24 h    | 48 h    | 72 h    | 96 h    | 120 h | 24 h  | 48 h  | 72 h    | 96 h  | 120 h | 24 h    | 48 h  | 72 h  | 96 h  | 120 h |
| $T_{low}$  | < 0.001 | < 0.001 | < 0.001 | 0.70    | 0.120 | 0.020 | 0.020 | 0.031   | 0.270 | 0.870 | 0.001   | 0.031 | 0.970 | 0.020 | 0.040 |
| $T_{high}$ | < 0.001 | < 0.001 | < 0.001 | < 0.001 | 0.310 | 0.01  | 0.005 | < 0.001 | 0.009 | 0.680 | < 0.001 | 0.002 | 0.005 | 0.230 | 0.560 |
| Bup        | 0.005   | < 0.001 | 0.003   | 0.550   | 0.560 | 0.009 | 0.031 | 0.190   | 0.860 | 0.980 | 0.070   | 0.590 | 0.050 | 0.720 | 0.020 |

**Table S3: Adjusted *p*-values - Two-way ANOVA fold change body weight (Tukey's multiple comparisons test)**

|    | Hours post-osteotomy | T <sub>low</sub> | T <sub>high</sub> | Bup    |
|----|----------------------|------------------|-------------------|--------|
| OT | 24 vs. 48            | 0.8              | >0.99             | 0.94   |
|    | 24 vs. 72            | <0.001           | 0.23              | 0.02   |
|    | 24 vs. 96            | <0.001           | <0.001            | <0.001 |
|    | 24 vs. 120           | <0.001           | <0.001            | <0.001 |
|    | 48 vs. 72            | 0.002            | 0.13              | 0.001  |
|    | 48 vs. 96            | <0.001           | <0.001            | <0.001 |
|    | 48 vs. 120           | <0.001           | <0.001            | <0.001 |
|    | 72 vs. 96            | <0.001           | 0.01              | 0.05   |
|    | 72 vs. 120           | <0.001           | <0.001            | 0.09   |
|    | 96 vs. 120           | 0.46             | <0.001            | >0.99  |
| AN | 24 vs. 48            | 0.89             | 0.01              | 0.07   |
|    | 24 vs. 72            | <0.001           | 0.79              | 0.98   |
|    | 24 vs. 96            | <0.001           | 0.05              | 0.19   |
|    | 24 vs. 120           | <0.001           | <0.001            | 0.35   |
|    | 48 vs. 72            | 0.003            | 0.22              | 0.24   |
|    | 48 vs. 96            | <0.001           | <0.001            | <0.001 |
|    | 48 vs. 120           | <0.001           | <0.001            | <0.001 |
|    | 72 vs. 96            | 0.001            | 0.001             | 0.05   |
|    | 72 vs. 120           | 0.009            | <0.001            | 0.12   |
|    | 96 vs. 120           | 0.97             | 0.07              | >0.99  |
| DW | 24 vs. 48            | 0.17             | 0.99              | >0.99  |
|    | 24 vs. 72            | <0.001           | 0.26              | 0.84   |
|    | 24 vs. 96            | <0.001           | <0.001            | 0.12   |
|    | 24 vs. 120           | <0.001           | <0.001            | 0.17   |
|    | 48 vs. 72            | 0.13             | 0.53              | 0.79   |
|    | 48 vs. 96            | <0.001           | <0.001            | 0.1    |
|    | 48 vs. 120           | <0.001           | <0.001            | 0.14   |
|    | 72 vs. 96            | 0.11             | 0.07              | 0.66   |
|    | 72 vs. 120           | 0.27             | <0.001            | 0.75   |

**Table S4: Exact  $p$ -values** for differences between measured and initial facial expression and body composite score (Wilcoxon signed rank test; hypothetical median = 0)

|            | OT    |       |       |       |       |       | AN    |       |       |       |        |       |
|------------|-------|-------|-------|-------|-------|-------|-------|-------|-------|-------|--------|-------|
| Groups     | 1 h   | 6 h   | 12 h  | 24 h  | 48 h  | 72 h  | 1 h   | 6 h   | 12 h  | 24 h  | 48 h   | 72 h  |
| $T_{low}$  | 0.008 | 0.008 | 0.031 | 0.016 | 0.125 | 0.125 | 0.125 | 0.125 | 0.250 | 0.250 | 0.500  | 0.500 |
| $T_{high}$ | 0.016 | 0.031 | 0.063 | 0.063 | 0.5   | 0.25  | 0.125 | 0.125 | 0.250 | 0.250 | 0.500  | -     |
| Bup        | 0.008 | 0.008 | 0.063 | 0.031 | 0.063 | 0.500 | 0.125 | 0.250 | -     | 0.500 | > 0.99 | -     |

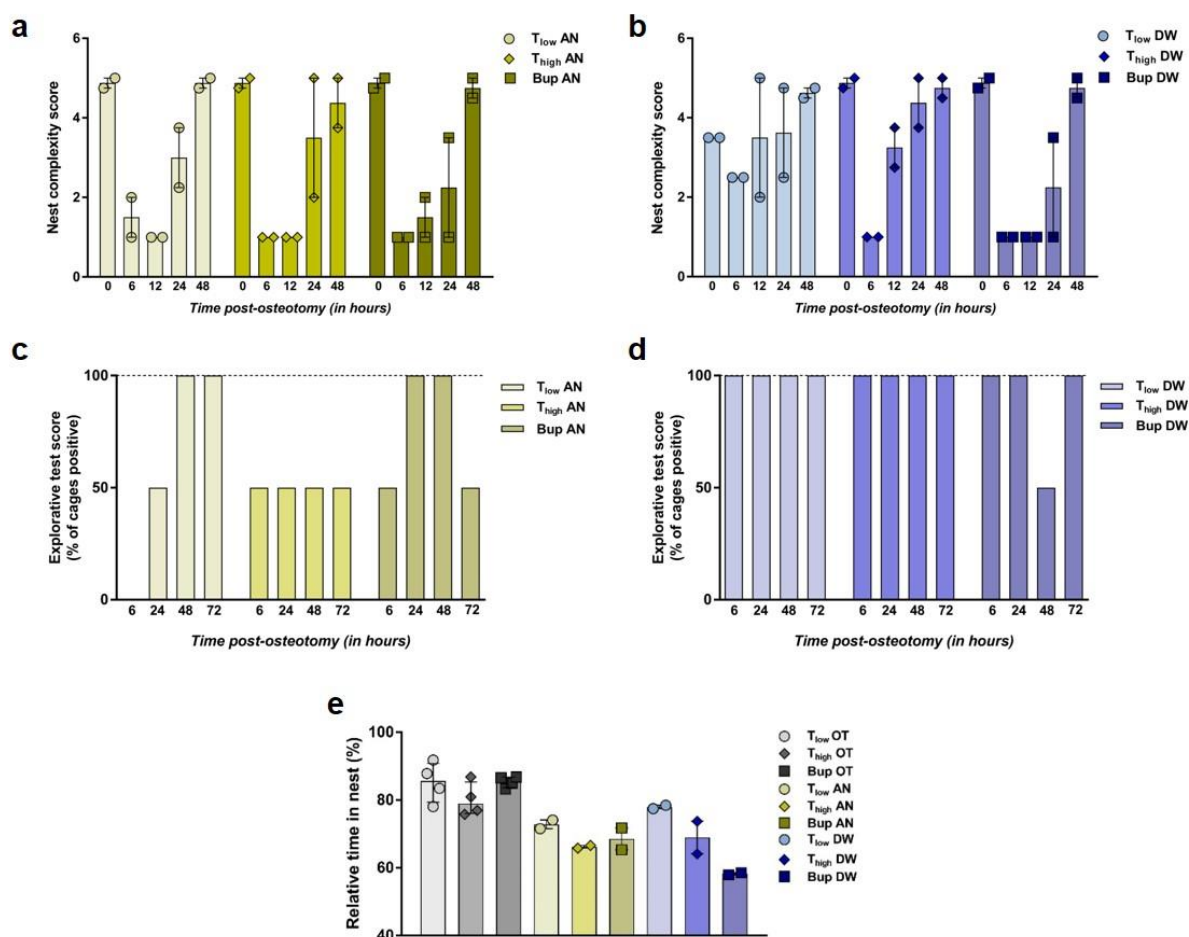

**Figure S2: Nest complexity and explorative test scores of control (AN, DW) groups.** (a, b) Nest complexity score are depicted for 0, 6, 12, 24 and 48 h post-osteotomy. Data are shown as scatter dot plot and bar with median  $\pm$  interquartile range for  $n = 2$  (cages). (c, d) The explorative test score is depicted for the OT groups as mean - percentage of cages that were determined positive for  $n = 2$  (cages). (e) Relative time spent in nest for 48 h as assessed via video analysis. Data are shown as scatter dot plot and bar with median  $\pm$  interquartile ranges ( $n = 2-4$ ).

**Table S5: Exact *p*-values** for differences between measured and initial limp score (Wilcoxon signed rank test; hypothetical median = 0)

| Groups            | OT               |              |                  |                  |                  |
|-------------------|------------------|--------------|------------------|------------------|------------------|
|                   | 1 h              | 6 h          | 24 h             | 48 h             | 72 h             |
| $T_{\text{low}}$  | <i>0.031</i>     | <i>0.250</i> | <i>0.250</i>     | <i>0.500</i>     | <i>0.500</i>     |
| $T_{\text{high}}$ | <i>0.031</i>     | <i>0.063</i> | <i>0.250</i>     | <i>0.500</i>     | <i>0.500</i>     |
| <b>Bup</b>        | <i>&gt; 0.99</i> | <i>0.500</i> | <i>&gt; 0.99</i> | <i>&gt; 0.99</i> | <i>&gt; 0.99</i> |

**Table S6: Overview on the different groups enrolled in the study**

| Group name and colour coding         | Osteotomy groups (OT)                                              |                   |               | Control groups (AN, DW) |                     |                      |                      |               |        |
|--------------------------------------|--------------------------------------------------------------------|-------------------|---------------|-------------------------|---------------------|----------------------|----------------------|---------------|--------|
|                                      | T <sub>low</sub>                                                   | T <sub>high</sub> | Bup           | T <sub>low</sub> AN     | T <sub>low</sub> DW | T <sub>high</sub> AN | T <sub>high</sub> DW | Bup AN        | Bup DW |
| Medication                           | Tramadol                                                           |                   | Buprenorphine | Tramadol                |                     |                      |                      | Buprenorphine |        |
| Dosage via drinking water 3d post-OP | 0.1 mg/ml                                                          | 1 mg/ml           | 0.009 mg/ml   | 0.1 mg/ml               |                     | 1 mg/ml              |                      | 0.009 mg/ml   |        |
| Mice number (n)                      | 8                                                                  | 8                 | 8             | 4                       | 4                   | 4                    | 4                    | 4             | 4      |
| Medication pre-OP                    | 0.03 ml Clindamycin s.c. and Buprenorphine 0.1 ml s.c. (1h prä-OP) |                   |               |                         |                     |                      |                      |               |        |
| Isoflurane anaesthesia               | yes                                                                |                   |               | yes                     | no                  | yes                  | no                   | yes           | no     |
| Euthansia after 2 weeks              | yes                                                                |                   |               | no - reuse              |                     |                      |                      |               |        |

**Table S7: Facial expression and body condition composite score adapted from Jirkof et al. <sup>1</sup>**

| Parameter                   | Specification                                                                                                                                                                         | Scores                                                               |
|-----------------------------|---------------------------------------------------------------------------------------------------------------------------------------------------------------------------------------|----------------------------------------------------------------------|
| <u>Facial expression</u>    |                                                                                                                                                                                       |                                                                      |
| <b>orbital tightening</b>   | narrowing of the orbital area, a tightly closed eyelid, or an eye squeeze (orbital muscles around the eyes contracted)                                                                | <b>not present = 0</b><br><b>moderately = 1</b><br><b>severe = 2</b> |
| <b>ear position</b>         | ears pulled back or rotate outwards and/or back, away from the face, space between the ears may appear wider                                                                          |                                                                      |
| <u>Body condition</u>       |                                                                                                                                                                                       |                                                                      |
| <b>spontaneous behavior</b> | sudden movements, backwards movements, transient involuntary muscular contraction of any body part, kicking with hind paws, licking/biting the wound, highly aggressive, vocalization | <b>not present = 0</b><br><b>present = 1</b>                         |
| <b>posture</b>              | hunched, arched back, crouched                                                                                                                                                        |                                                                      |
| <b>coat condition</b>       | ruffled, dirty, unkempt, piloerection, hair loss (alopecia)                                                                                                                           |                                                                      |
| <b>eyes</b>                 | discharge                                                                                                                                                                             |                                                                      |
| <b>body condition</b>       | sunken flanks, swollen areas, ascites                                                                                                                                                 |                                                                      |
| <b>wound</b>                | dirty, bloody, uncleaned, signs of self-injury, signs of inflammation or necrosis, i.e., unusual color (e.g., red, pale) or swollen                                                   |                                                                      |
| <b>movement</b>             | apathetic, sedated, decelerated, crawling, immobile, lameness, tiptoe gait                                                                                                            |                                                                      |

**Table S8: Limp score** adapted from <sup>2-4</sup>

|                   | Parameter       | Specification                                       | Scores   |
|-------------------|-----------------|-----------------------------------------------------|----------|
| <b>Limp Score</b> | <b>Limping</b>  | • normal use                                        | <b>0</b> |
|                   |                 | • sporadic limping/hopping, complete ground contact | <b>1</b> |
|                   |                 | • limping, constant hopping                         | <b>2</b> |
|                   |                 | • partial non-use of limb                           | <b>3</b> |
|                   |                 | • complete lack of use                              | <b>4</b> |
|                   | <b>Dragging</b> | • normal use                                        | <b>0</b> |
|                   |                 | • sporadic dragging of toes                         | <b>1</b> |
|                   |                 | • constant dragging of toes                         | <b>2</b> |
|                   |                 | • sporadic dragging of complete leg                 | <b>3</b> |
|                   |                 | • constant dragging of complete leg                 | <b>4</b> |

## References

- 1 Jirkof, P., Tourvieille, A., Cinelli, P. & Arras, M. Buprenorphine for pain relief in mice: repeated injections vs sustained-release depot formulation. *Laboratory animals*, doi:10.1177/0023677214562849 (2014).
- 2 Jimenez-Andrade, J. M. *et al.* Nerve growth factor sequestering therapy attenuates non-malignant skeletal pain following fracture. *Pain* **133**, 183-196, doi:10.1016/j.pain.2007.06.016 (2007).
- 3 Koewler, N. J. *et al.* Effects of a monoclonal antibody raised against nerve growth factor on skeletal pain and bone healing after fracture of the C57BL/6J mouse femur. *J Bone Miner Res* **22**, 1732-1742, doi:10.1359/jbmr.070711 (2007).
- 4 Minville, V., Laffosse, J. M., Fourcade, O., Girolami, J. P. & Tack, I. Mouse model of fracture pain. *Anesthesiology* **108**, 467-472 (2008).
